# Supplementary material for: Variations in BK Polyomavirus Immunodominant Large Tumor Antigen-Specific 9mer CD8 T-Cell Epitopes Predict Altered HLA-Presentation and Immune Failure
Source: MDPI journal article supplement (doi:10.3390/v12121476), 2020-12-21
Supplement: s1 [file s1]

Figure S1. LTag sequence conservation among BKPyV subtypes;

Figure S2. BKPyV LTag-9mer T-cell immune escape map. Table S1. Sequence conservation of BKPyV LTag.
