# Supplementary material for: Variations in BK Polyomavirus Immunodominant Large Tumor Antigen-Specific 9mer CD8 T-Cell Epitopes Predict Altered HLA-Presentation and Immune Failure
Source: MDPI journal article supplement (doi:10.3390/v12121476), 2020-12-21
Supplement: s1 [file s1]

1 MDKVLNREESMELMDLLGLERAAWGNLPLMRKAYLRKCKEFHFPDKGGDEDKMKRMNTLYKKMEQDVKVAHQPDFGTWSSSEVPTYGTEEWESWWSSFNEKWDEDLFCHEDMFASDEEATADSQHSTPPK 129

124 HSTPPKPKKRKVEDPKDFPSDLHQFLSQAVFSNRTLACFAVYTTKEKAQILYKKLMEKYSVTFISRHMCAGHNIIFFLTTPHRRVSAINNFCQKLCTFSFLICKGVNKEYLLYSALTRDPYHTIEESIQ 251

PLMRKAYLK  
 SLMRKAYLR  
 ↓LSLMRKAYL  
 NLSLMRKAY  
 AYLRRCKEF  
 ↑AYLKKCKEF  
 KAYLRRCKE  
 KAYLKKCKE  
 ↑RAAWGNLSL  
 LGRAAWGNL LMRKAYLR  
 PERAAWGNL LMRKAYLK  
 DLQHSTPPK  
 ELQHSTPPK  
 RKDEDPKDF  
 KKKRKDEDP  
 KEKRKVEDP  
 PKKKRKDED  
 PKKRKVED  
 PPKEKRKDE  
 PPKKRKVE  
 ↓TPPKKKRKD  
 ↓↑TPPKKRKV  
 STPPKEKRK  
 HSTPPKEKR  
 ↑FPSDLHHFL  
 ↑FPSDVHQFL  
 ↓FPCDLHQFL  
 DFPSDLHHF  
 DFPSDVHQF  
 ↓DFPCDLHQF  
 ↓DPKDFPSDV  
 ↓DPKDFPCDL  
 REVEDPKDF  
 KKKREVEDP  
 PKKKREVED  
 PPKKREVE  
 ↑TPPKKKREV  
 STPPKKRE  
 ↑HAFVSNRTL  
 LSHAFVSNR  
 ↑HQFLSHAVF  
 ↑HHFLSQAVF  
 KAQIVYKKL  
 KAQMLYKKL  
 KALILYKKL  
 KALILYKKV  
 KVLILYKKL  
 KEKAQIVYK  
 KEKAQMLYK  
 KEKALILYK  
 KEKVLILYK  
 TKEKAQVLY  
 TKEKAQMLY  
 TKEKALILY  
 TKEKVLILY  
 NKEKAQILY  
 ↑TNKEKAQIL  
 ↑TTKEKVLIL  
 ↓TTKEKAQIV  
 ↓TTKEKAQML  
 ↓TTKEKALIL  
 MEKYSVTLI  
 MEKYPVTFI  
 ↑LMEKYSVTL  
 ↑LMEKYPVTF  
 ↑VMEKYSVTF  
 KLMEKYPVT  
 KVMKYSVT  
 ↑LYKKVMEKY  
 ↑VYKKLMEKY  
 ILYKKVMEK  
 IVYKKLMEK  
 MLYKKLMEK  
 LYSFLTPHR  
 AGHNLYSFL  
 CAGHNLYSF  
 MCAGHNLYS  
 VCAGHNIIF  
 ICAGHNIIF  
 RHVCAGHNI  
 RHICAGHNI  
 RQMCAGHNI  
 CEKLCTFSF  
 NFCEKLCTF  
 PYHTIEESI  
 ↑PYTIEESI  
 ↑PYTIEESI  
 ↓LTRDPYHII  
 ↓LTRDPYII  
 ↓LTRDPYTI  
 LTRDPYHTI  
 ↓LTRNPYII  
 ↓LTKEPYHTI  
 ↓LTKDPYHTI  
 YSALTRNPY  
 YSALTREPY  
 YSALTKEPY  
 YSALTKDPY

↓MYLEFQYNA  
 LSMYLEFQY  
 LLLSMYLEF  
 DVFLLLSMY  
 DVLLLLGMY  
 KCEDVLLLL  
 TKCEDVLLL  
 252 GGLKEHDFNPEEPEETKQVSWKLITEYAVETKCEDVFLLLGMYLEFQYNVEECKKCQKKDQPYHFKYHEKHFNATIFAESKNQKSICQQAVDVLAKKRVDTLHMTREEMLT~~ERF~~NHILDKMDLI~~F~~ 378  
 REEMLT~~NR~~F  
 REEMLT~~GS~~F HILD~~R~~MDLI  
 REEMLT~~DR~~F↑YILDKMDLI

FLHCVVFNV  
 FDFLHCVVF  
 ↓VIFDFLHCV  
 ↓VRDFLHCI  
 MDSVRDFDL ↑VPKRRYWLL  
 ↓KMDSVRDFD VVFNVPKRR  
 379 GAHGNAVLEQYMAGVAWLHCLLPKMDSVIFDFLHCIVFNVPKRRYWLFKGPIDSGKTTLAAGLLDLCGGKALNVNLPMERLTFELGVAIDQYMVVFEDVKGTGAESKDLPSGHGINNLD~~S~~LRDYL 503  
 RGKALNVNL  
 LDLCRGKAL  
 GLLDLCRGK

KTLHARFVR  
 ↑VPKTLHARF  
 ↓YPVPKTLHA  
 ↓YPGPKTLQA  
 ↓YAVPKTLQA  
 NEYPGPKTL  
 NEYAVPKTL  
 NKYPVPKTL  
 ↓NDYPVPKTL  
 TMNEYPGPK  
 TMNEYAVPK ↓IHTYFRPKI  
 TMNKYPVPK ↑ARFLIHTYF  
 TMNDYPVPK LHARFLIHT  
 504 DGSVKVNLEKKHLNKRTQIFPPGLVTMNEYVPVKTLQARFVRQIDFRPKIYLRKSLQNSEFLLLEKRILQSGMTLLLLLIWFRPVADFATDIQSRIVEWKERLDSEISMYTFSRMKYNICMGKCIL 628  
 LLLIWSRPV  
 LLLLLIWSR  
 TLLLLLIWS  
 ITLLLLLIW  
 ↓GITLLLLLI  
 SGITLLLLL  
 LQSGITLLL  
 ILQSGITLL  
 ↓RILQSGITL IWSRPVADF

629 DITREEDSETEDSGHGSSTESQSQCSSQVSDTSAPAEDSQRLDPHSQELHLCKGFQCFKRPKTPPPK\*

| Frequency of 9mer variants (%) |          |           |               |
|--------------------------------|----------|-----------|---------------|
| <1%                            | 1% - <5% | 5% - <10% | 10% - < 25.0% |
