# Supplementary figures and images for: Variations in BK Polyomavirus Immunodominant Large Tumor Antigen-Specific 9mer CD8 T-Cell Epitopes Predict Altered HLA-Presentation and Immune Failure
Source: MDPI journal article supplement (doi:10.3390/v12121476), 2020-12-21

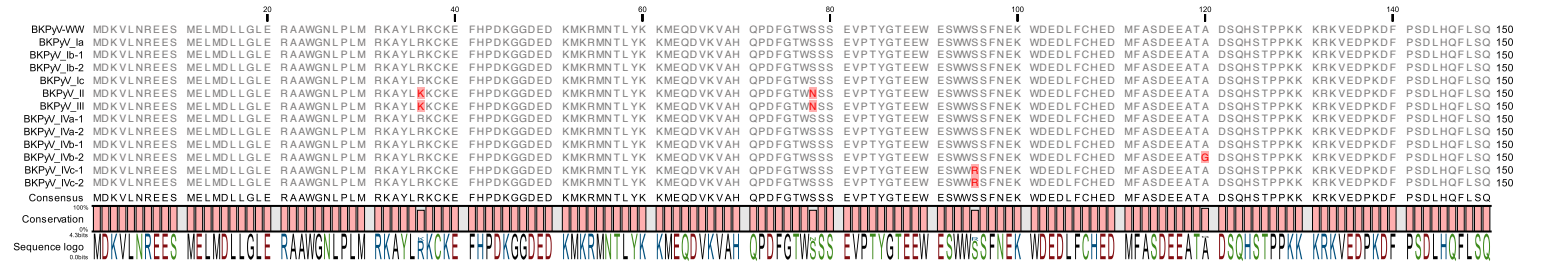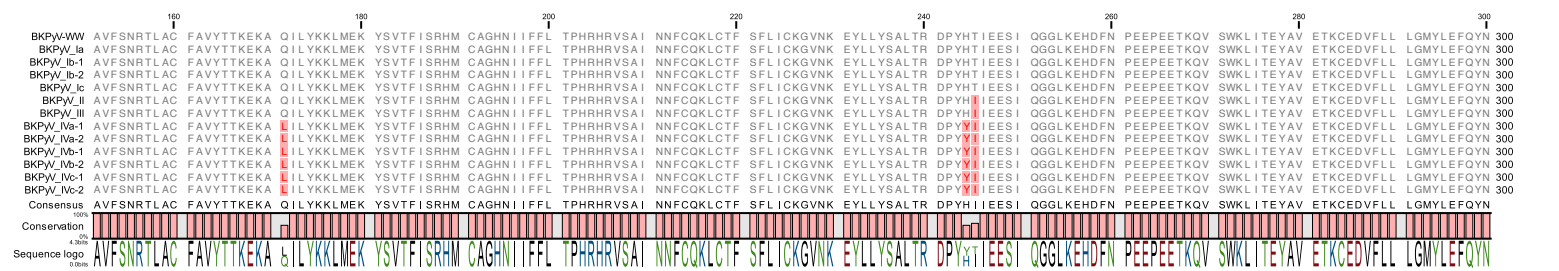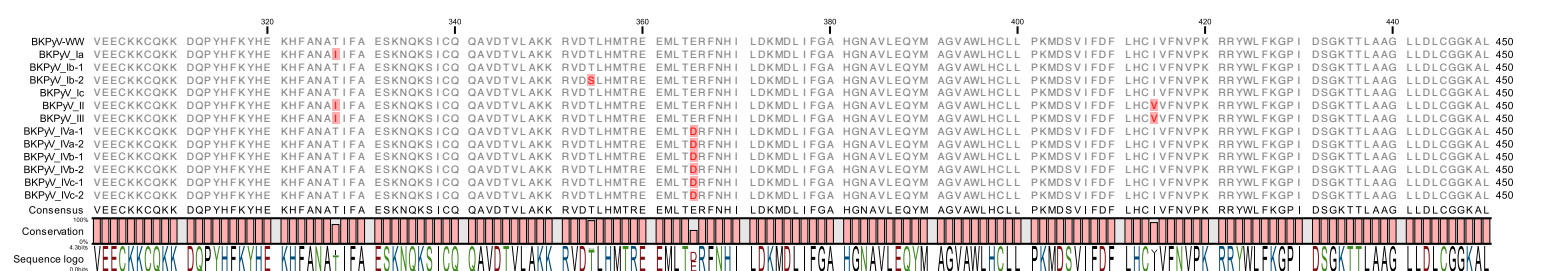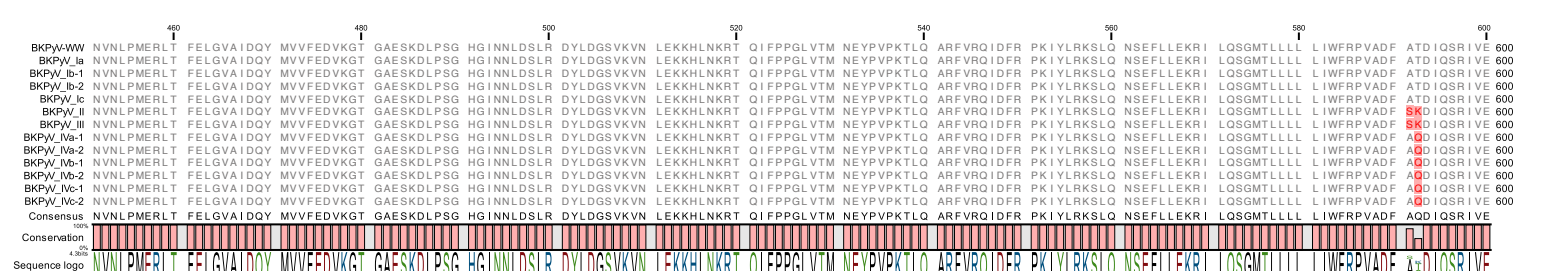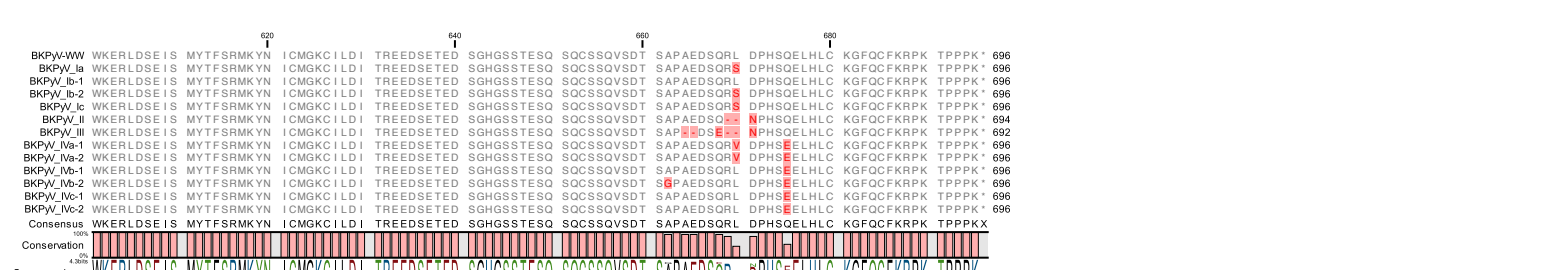

Supplement: s1 [file s1]
